# Supplementary material for: The calcitic test growth rate of Spirillina vivipara (Foraminifera)
Source: Copernicus journal article supplement (doi:10.5194/egusphere-2023-2259), 2023-11-08
Supplement: Supplementary file 1 [file egusphere-2023-2259-supplement.pdf]

## Supplemental material

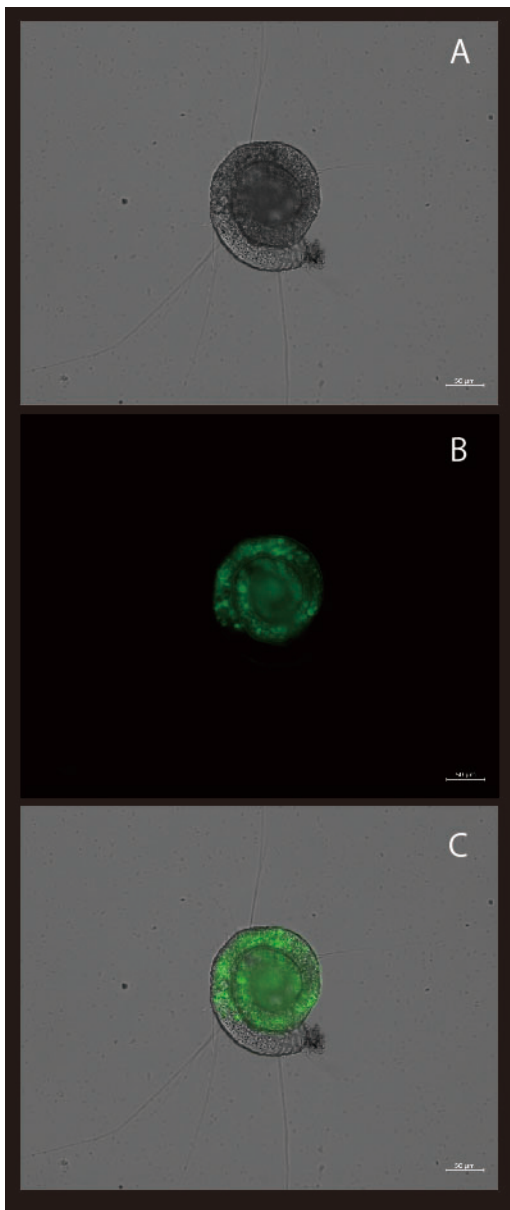

Figure. s1: Results of Calcein staining conducted in the final 24 hours of a 72-hour fasting period for specimens not fed. (A) Image under Differential Interference Contrast (DIC) microscopy. Pseudopods can be observed. Although no food was provided, the organism appears normal behavior. (B) Image highlighting Calcein signal. (C) Overlay of images A and B. The absence of a Calcein signal in the shell indicates that shell formation did not occur due to the lack of feeding. As the specimen is alive, the cytoplasm has incorporated Calcein, making its signal detectable.
